# Supplementary material for: Phenazine Derivatives with Anti-Inflammatory Activity from the Deep-Sea Sediment-Derived Yeast-Like Fungus Cystobasidium laryngis IV17-028
Source: PubMed Central journal article supplement (PMC6722648; doi:10.3390/md17080482), 2019-08-19
Supplement: marinedrugs-17-00482-s001.pdf [file marinedrugs-17-00482-s001.pdf]

*Supplementary Information*

**Phenazine Derivatives with Anti-inflammatory Activity  
from the Deep-Sea Sediment-Derived Yeast-Like Fungus  
*Cystobasidium laryngis* IV17-028**

**Hwa-Sun Lee <sup>1</sup>, Jong soon Kang <sup>2</sup>, Byeoung-Kyu Choi <sup>1</sup>, Hyi-Seung Lee <sup>1</sup>, Yeon-Ju Lee <sup>1</sup>, Jihoon Lee <sup>1</sup> and Hee Jae Shin <sup>1,\*</sup>**

<sup>1</sup> Marine Natural Products Chemistry Laboratory, Korea Institute of Ocean Science Technology, 385 Haeyang-ro, Yeongdo-gu, Busan 49111, Republic of Korea; [hwasunlee@kiost.ac.kr](mailto:hwasunlee@kiost.ac.kr) (H.-S.L.); [choibk4404@kiost.ac.kr](mailto:choibk4404@kiost.ac.kr) (B.-K.C.); [hslee@kiost.ac.kr](mailto:hslee@kiost.ac.kr) (H.-S.L.); [yjlee@kiost.ac.kr](mailto:yjlee@kiost.ac.kr) (Y.-J.L.); [jihoonlee@kiost.ac.kr](mailto:jihoonlee@kiost.ac.kr) (J.L.)

<sup>2</sup> Laboratory Animal Resource Center, Korea Research Institute of Bioscience and Biotechnology, 30 Yeongudangi-ro, Ochang-eup, Cheongwon-gu, Cheongju 28116, Republic of Korea; [kanjon@kribb.re.kr](mailto:kanjon@kribb.re.kr)

\*Correspondence: [shinhj@kiost.ac.kr](mailto:shinhj@kiost.ac.kr); Tel.: +82-51-664-3341

## Contents

- Figure S1.**  $^1\text{H}$  NMR spectrum of compound **1** (600 MHz,  $\text{CD}_3\text{OD}$ ).
- Figure S2.**  $^1\text{H}$  NMR spectrum of compound **1** (600 MHz,  $\text{CDCl}_3$ ).
- Figure S3.**  $^{13}\text{C}$  NMR spectrum of compound **1** (150 MHz,  $\text{CD}_3\text{OD}$ ).
- Figure S4.** HSQC spectrum of compound **1** in  $\text{CD}_3\text{OD}$ .
- Figure S5.** COSY spectrum of compound **1** in  $\text{CD}_3\text{OD}$ .
- Figure S6.** HMBC spectrum of compound **1** in  $\text{CD}_3\text{OD}$ .
- Figure S7.** ROESY spectrum of compound **1** in  $\text{CD}_3\text{OD}$ .
- Figure S8.** HRESI-MS spectrum of compound **1**.
- Figure S9.**  $^1\text{H}$  NMR spectrum of compound **2** (600 MHz,  $\text{CDCl}_3$ ).
- Figure S10.**  $^{13}\text{C}$  NMR spectrum of compound **2** (150 MHz,  $\text{CDCl}_3$ ).
- Figure S11.** HSQC spectrum of compound **2** in  $\text{CDCl}_3$ .
- Figure S12.** COSY spectrum of compound **2** in  $\text{CDCl}_3$ .
- Figure S13.** HMBC spectrum of compound **2** in  $\text{CDCl}_3$ .
- Figure S14.** HRESI-MS spectrum of compound **2**.
- Figure S15.**  $^1\text{H}$  NMR spectrum of compound **3** (600 MHz,  $\text{CDCl}_3$ ).
- Figure S16.**  $^{13}\text{C}$  NMR spectrum of compound **3** (150 MHz,  $\text{CDCl}_3$ ).
- Figure S17.** HSQC spectrum of compound **3** in  $\text{CDCl}_3$ .
- Figure S18.** COSY spectrum of compound **3** in  $\text{CDCl}_3$ .
- Figure S19.** HMBC spectrum of compound **3** in  $\text{CDCl}_3$ .
- Figure S20.** HRESI-MS spectrum of compound **3**.
- Figure S21.**  $^1\text{H}$  NMR spectrum of compound **4** (600 MHz,  $\text{CDCl}_3$ ).
- Figure S22.**  $^{13}\text{C}$  NMR spectrum of compound **4** (150 MHz,  $\text{CDCl}_3$ ).
- Figure S23.**  $^1\text{H}$  NMR spectrum of compound **5** (600 MHz,  $\text{CDCl}_3$ ).
- Figure S24.**  $^1\text{H}$  NMR spectrum of compound **6** (600 MHz,  $\text{CDCl}_3$ ).
- Figure S25.**  $^1\text{H}$  NMR spectrum of compound **7** (600 MHz,  $\text{CDCl}_3$ ).
- Figure S26.**  $^1\text{H}$  NMR spectrum of semi-synthesized **1** (600 MHz,  $\text{CDCl}_3$ ).

**Figure S27.** LR-MS spectrum of semi-synthesized **1**.

**Figure S28.** Comparison of  $^1\text{H}$  NMR data between semi-synthesized **1** and natural **1**.

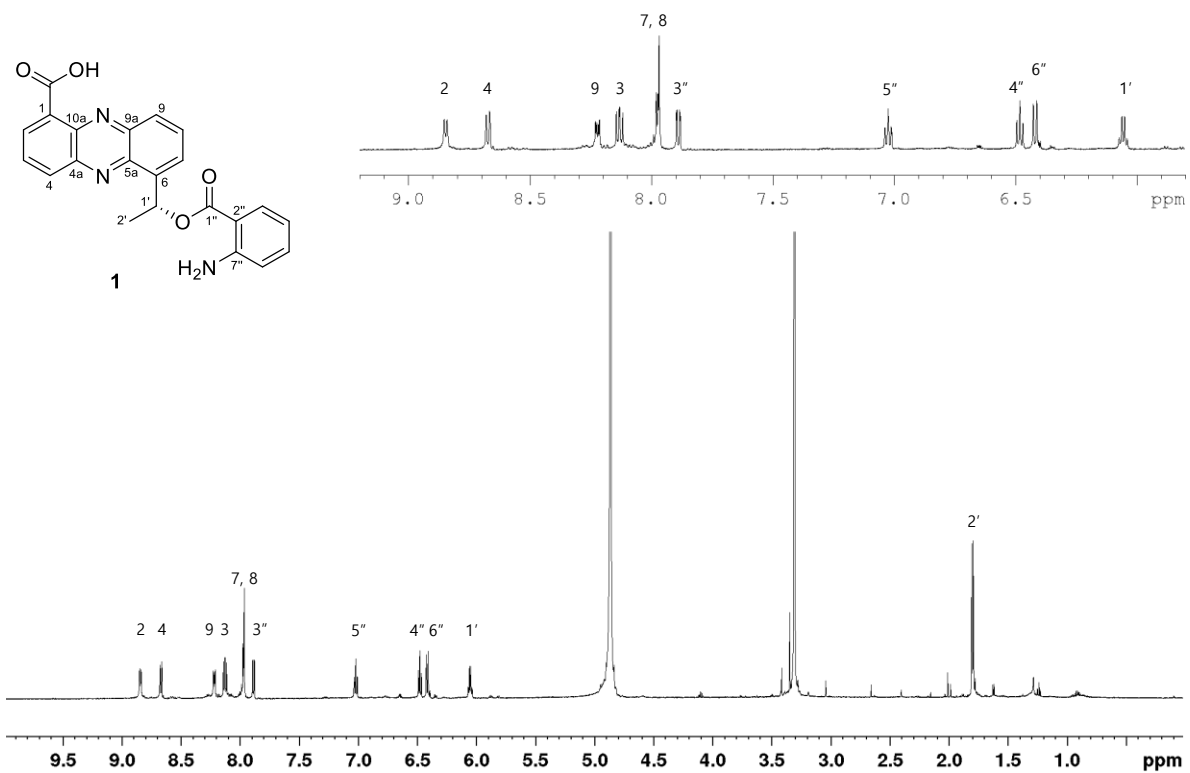

Figure S1. <sup>1</sup>H NMR spectrum of compound **1** (600 MHz, CD<sub>3</sub>OD).

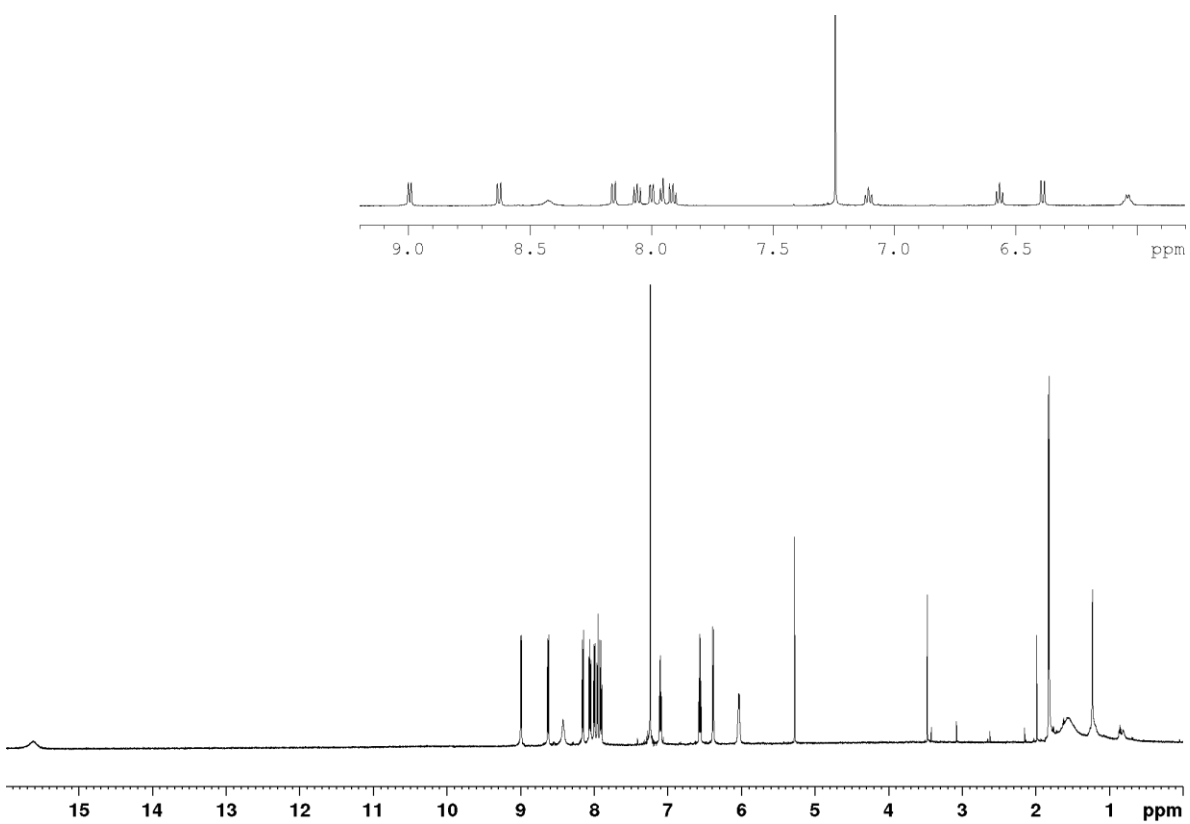

Figure S2. <sup>1</sup>H NMR spectrum of compound **1** (600 MHz, CDCl<sub>3</sub>).

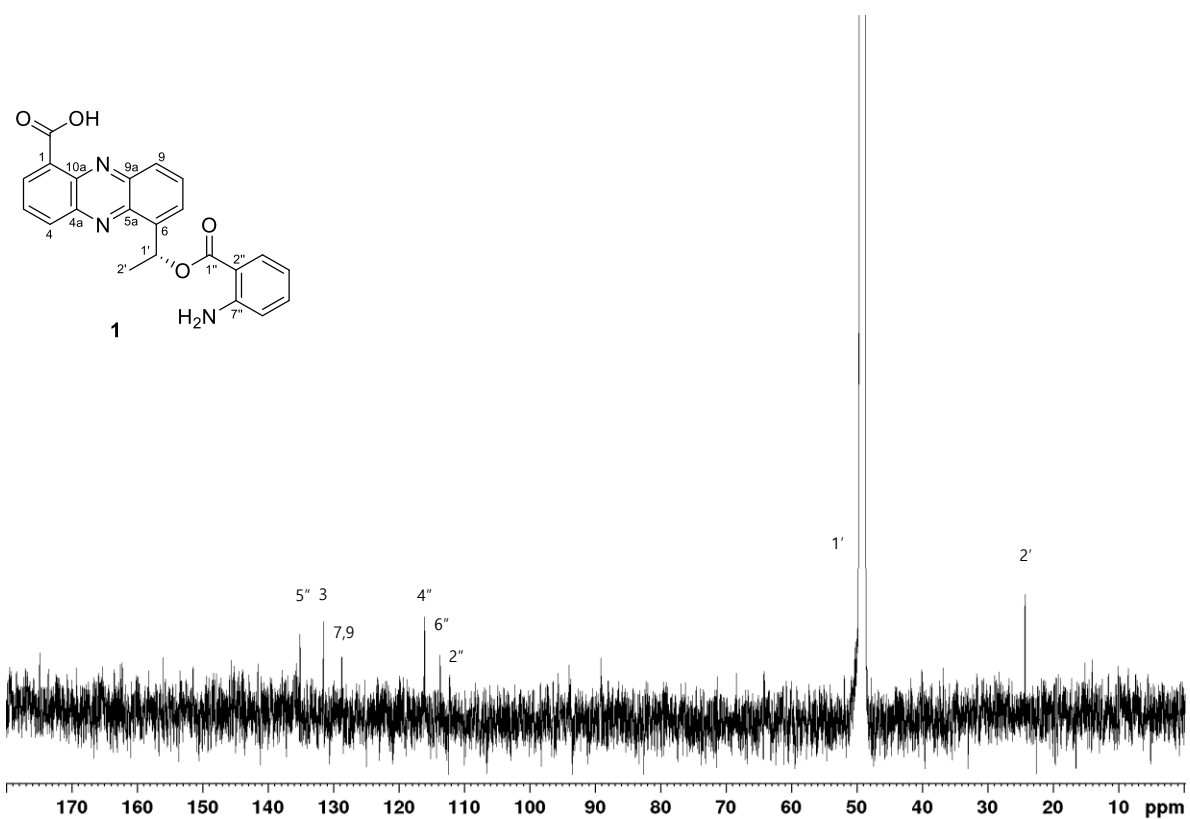

Figure S3.  $^{13}\text{C}$  NMR spectrum of compound **1** (150 MHz,  $\text{CD}_3\text{OD}$ ).

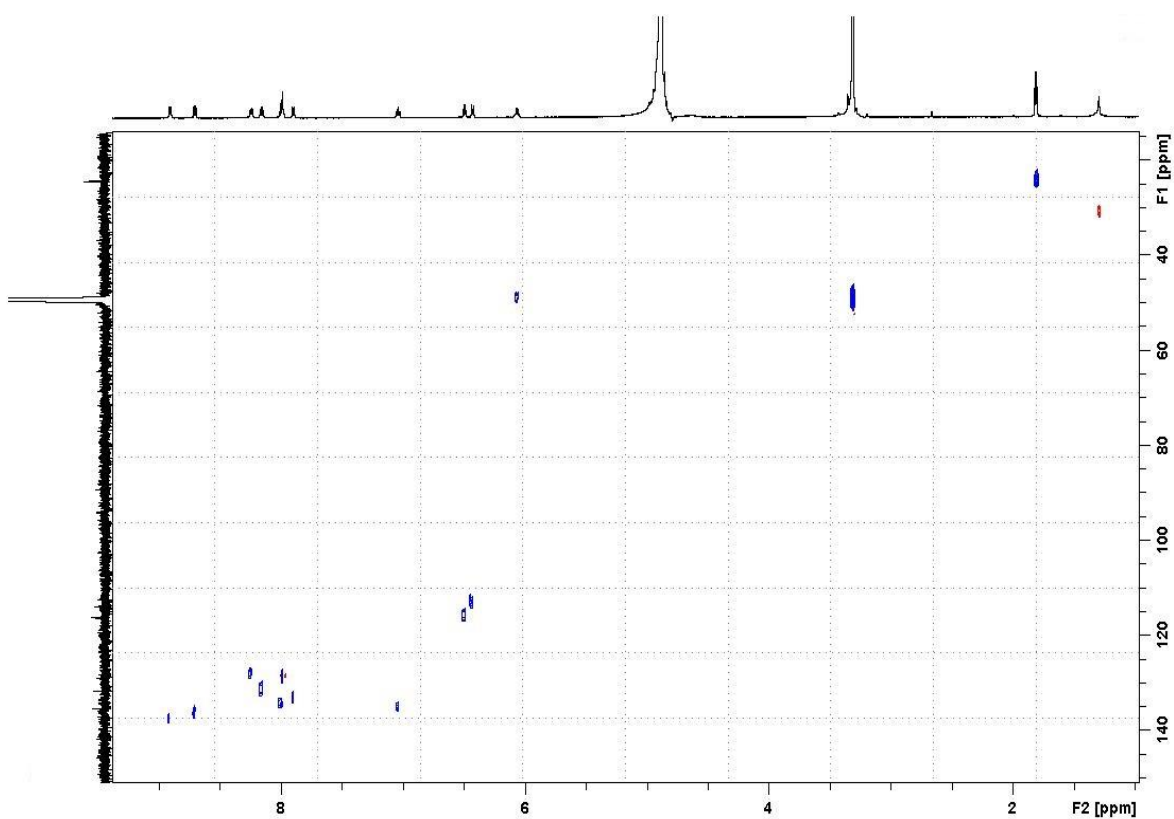

Figure S4. HSQC spectrum of compound **1** in  $\text{CD}_3\text{OD}$ .

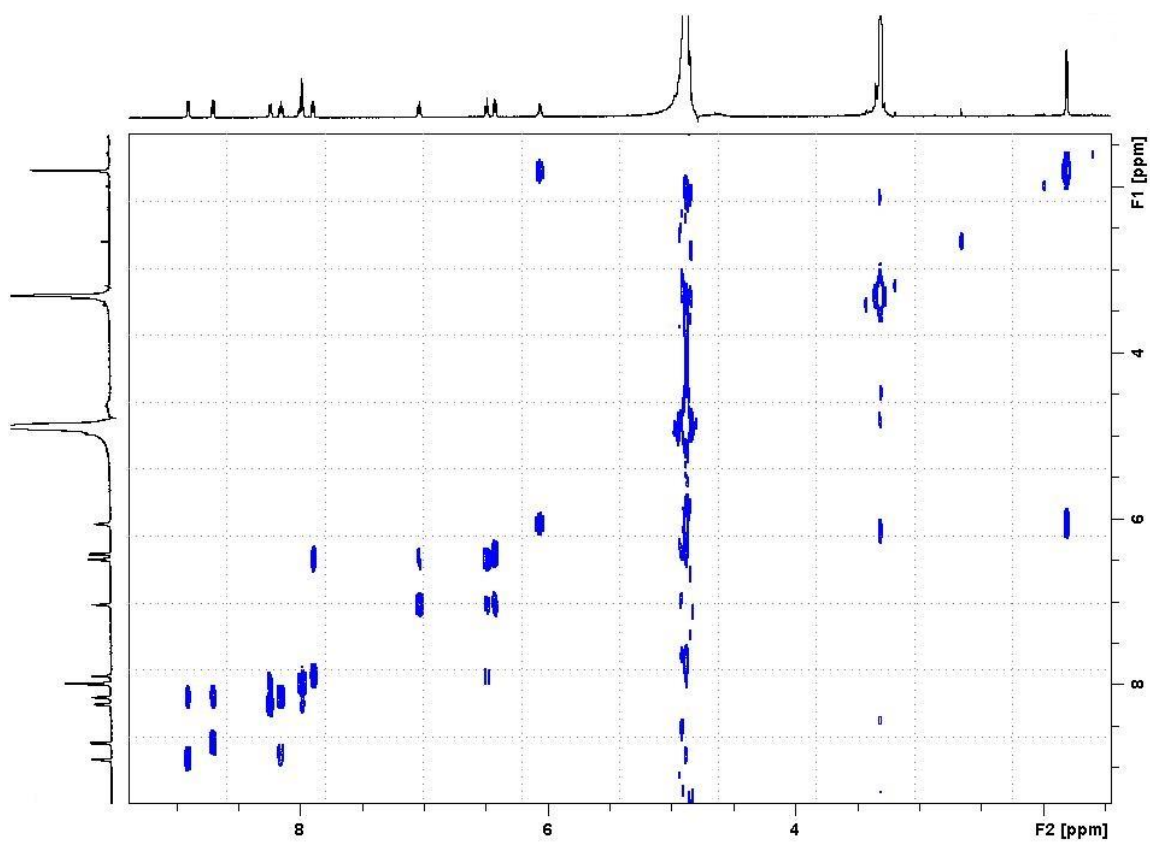

Figure S5. COSY spectrum of compound 1 in CD<sub>3</sub>OD.

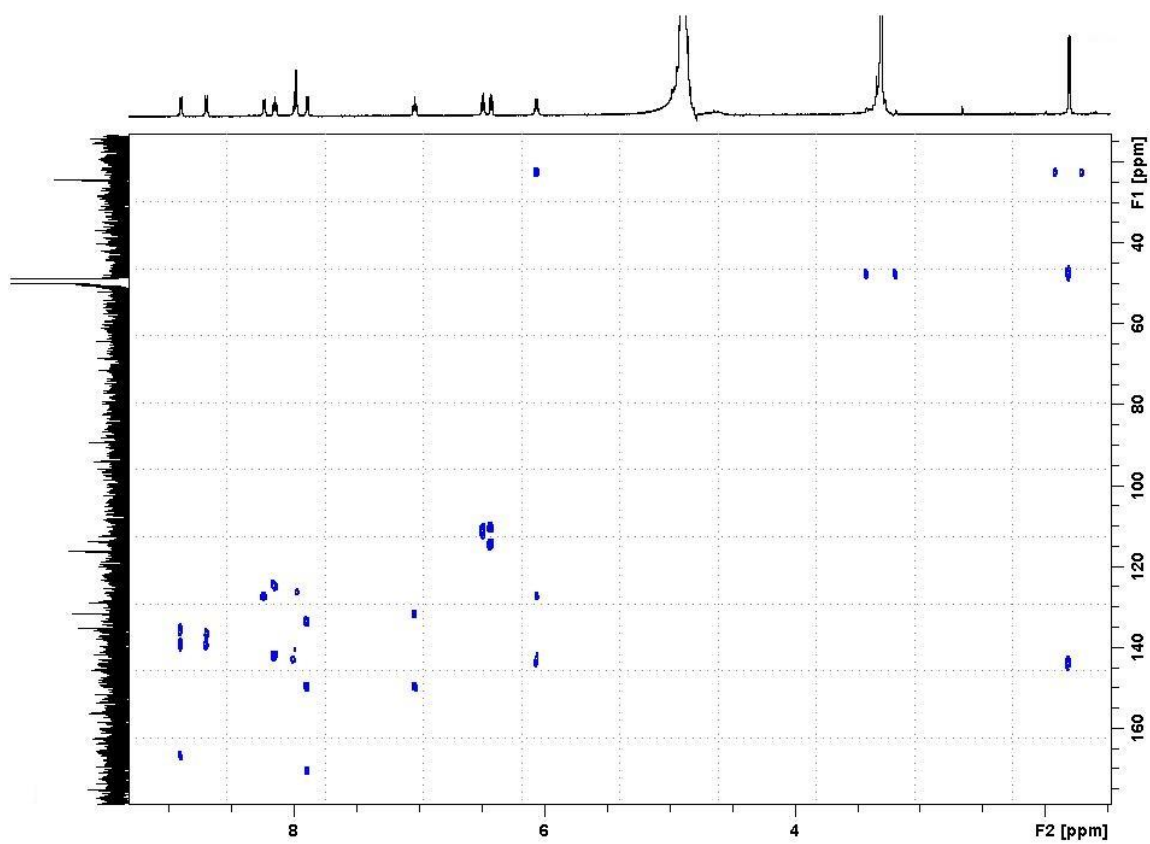

Figure S6. HMBC spectrum of compound 1 in CD<sub>3</sub>OD.

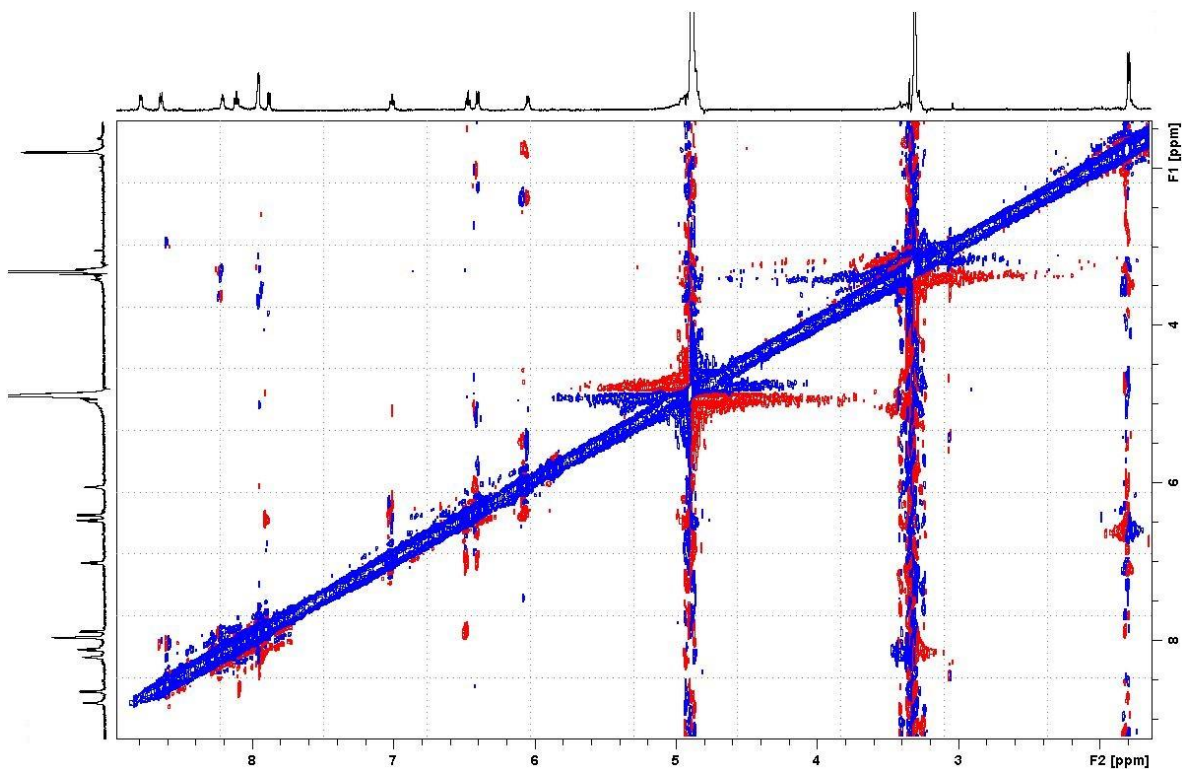

Figure S7. ROESY spectrum of compound 1 in CD<sub>3</sub>OD.

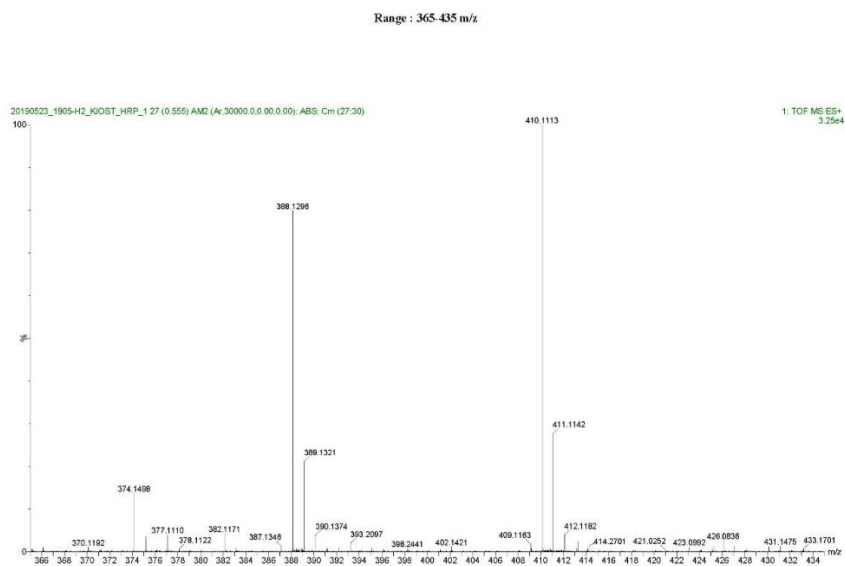

Elemental Composition Report

Single Mass Analysis  
 Tolerance = 5.0 PPM / DBE: min = -1.5, max = 100.0  
 Element prediction: Off  
 Number of isotope peaks used for i-FIT = 3

Monoisotopic Mass, Even Electron Ions  
 72 formula(e) evaluated with 2 results within limits (all results (up to 1000) for each mass)

Elements Used:

C: 0-25 H: 0-20 N: 1-3 O: 1-4 Na: 0-1

Minimum: -1.5

Maximum: 500.0 5.0 100.0

| Mass     | Calc. Mass | mDa  | PPM  | DBE  | i-FIT | Norm  | Conf(%) | Formula          |
|----------|------------|------|------|------|-------|-------|---------|------------------|
| 388.1296 | 388.1297   | -0.1 | -0.3 | 15.5 | 521.8 | 0.992 | 37.08   | C22 H18 N3 O4    |
|          | 388.1313   | -1.7 | -4.4 | 16.5 | 521.3 | 0.463 | 62.92   | C25 H19 N O2 Na  |
| 410.1113 | 410.1117   | -0.4 | -1.0 | 15.5 | 609.9 | n/a   | n/a     | C22 H17 N3 O4 Na |

Figure S8. HRESI-MS spectrum of compound 1.

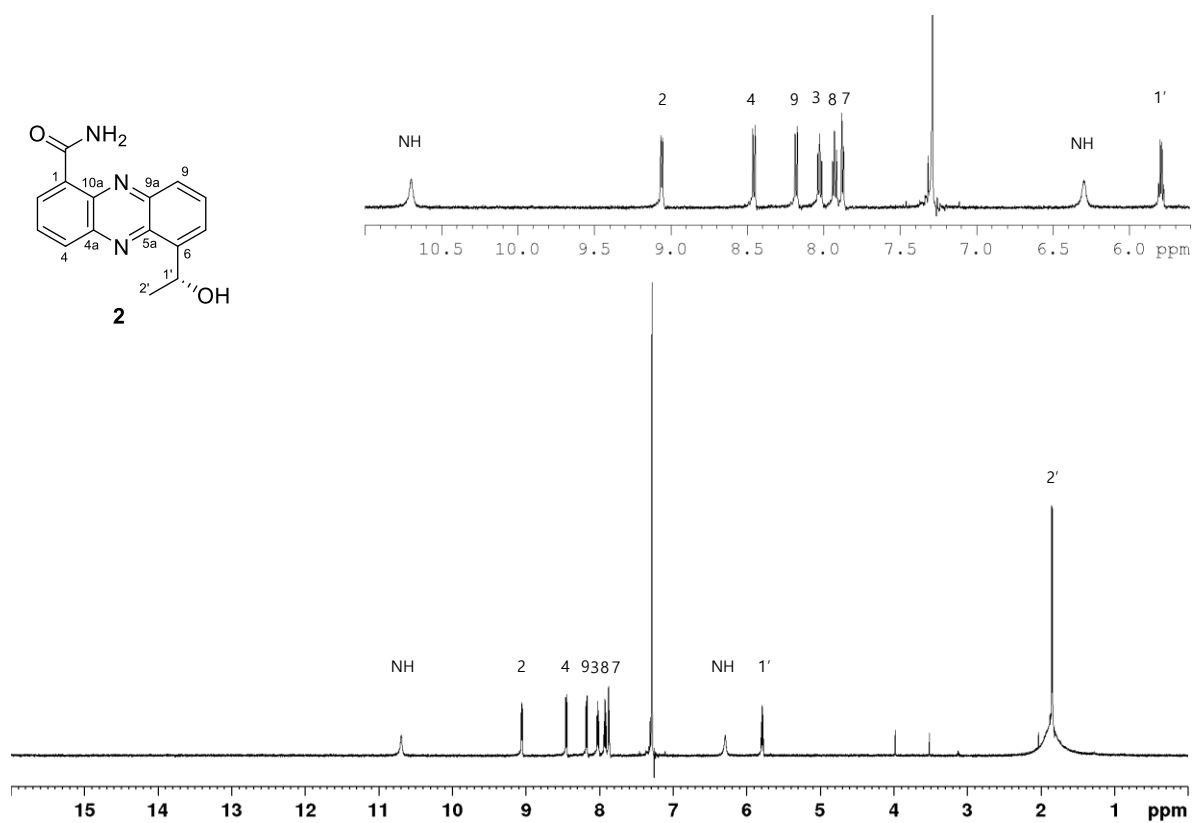

Figure S9.  $^1\text{H}$  NMR spectrum of compound **2** (600 MHz,  $\text{CDCl}_3$ ).

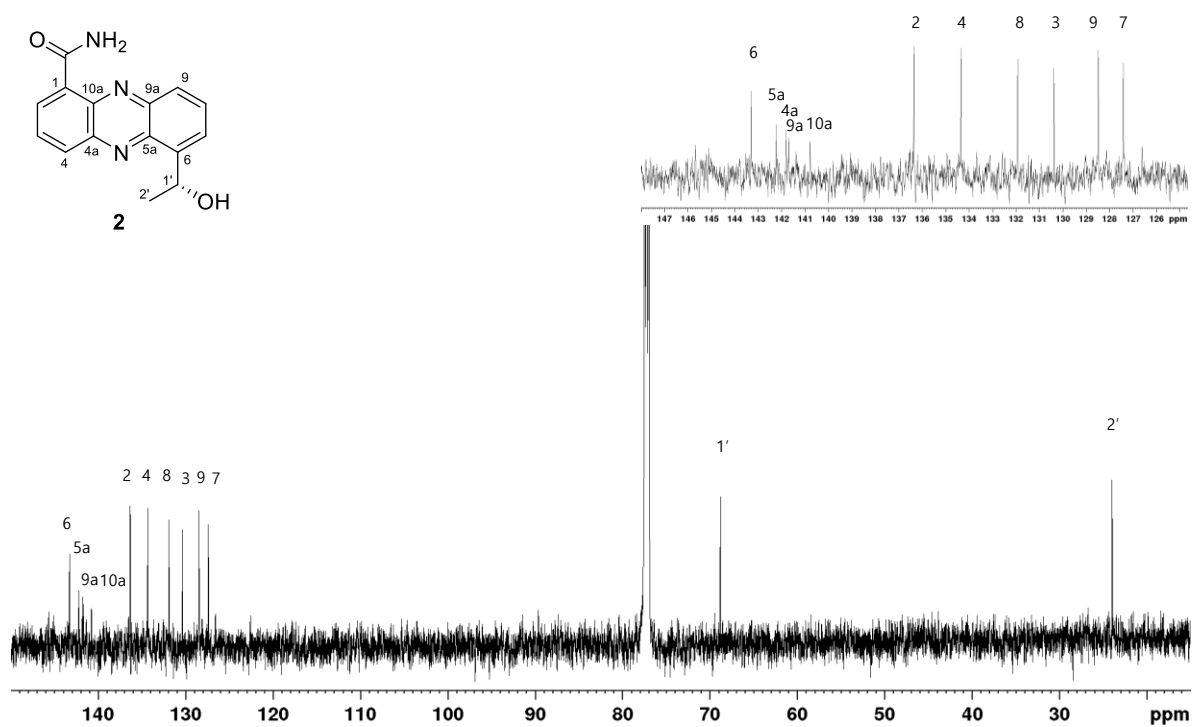

Figure S10.  $^{13}\text{C}$  NMR spectrum of compound **2** (150 MHz,  $\text{CDCl}_3$ ).



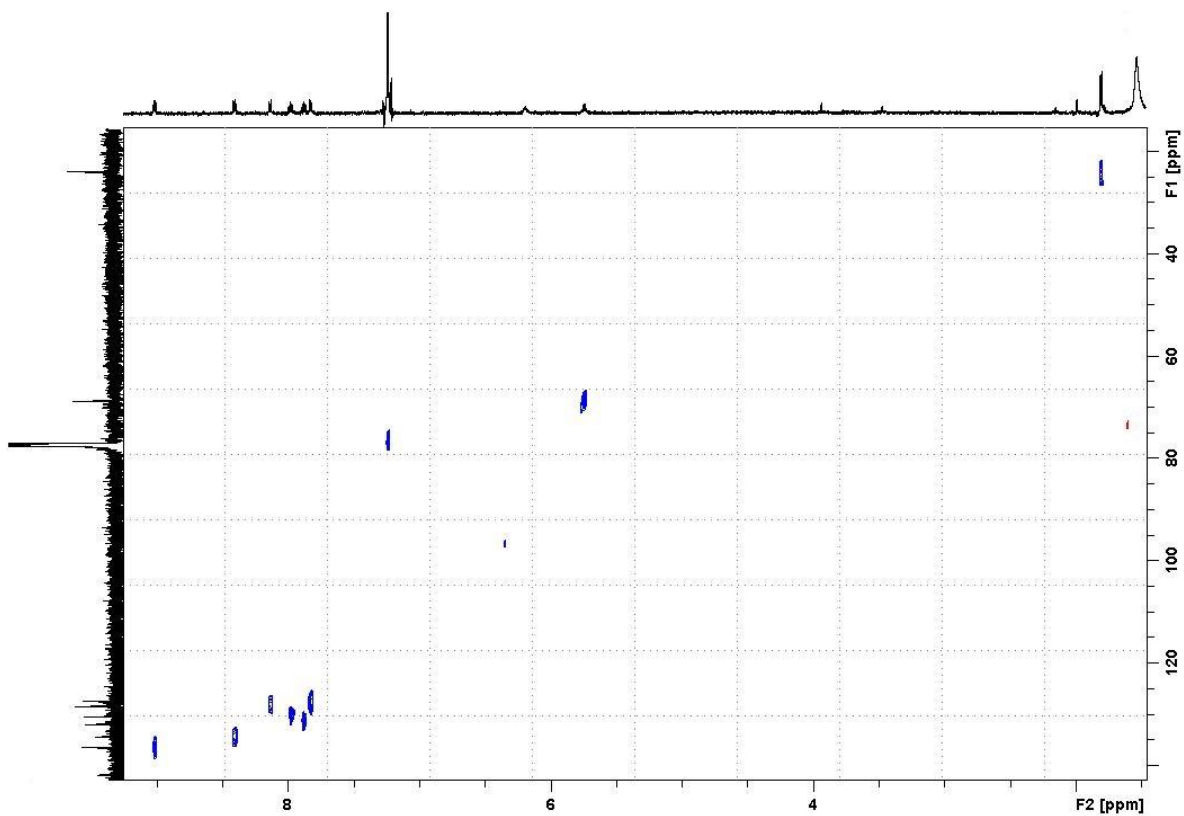

Figure S11. HSQC spectrum of compound 2 in CDCl<sub>3</sub>.

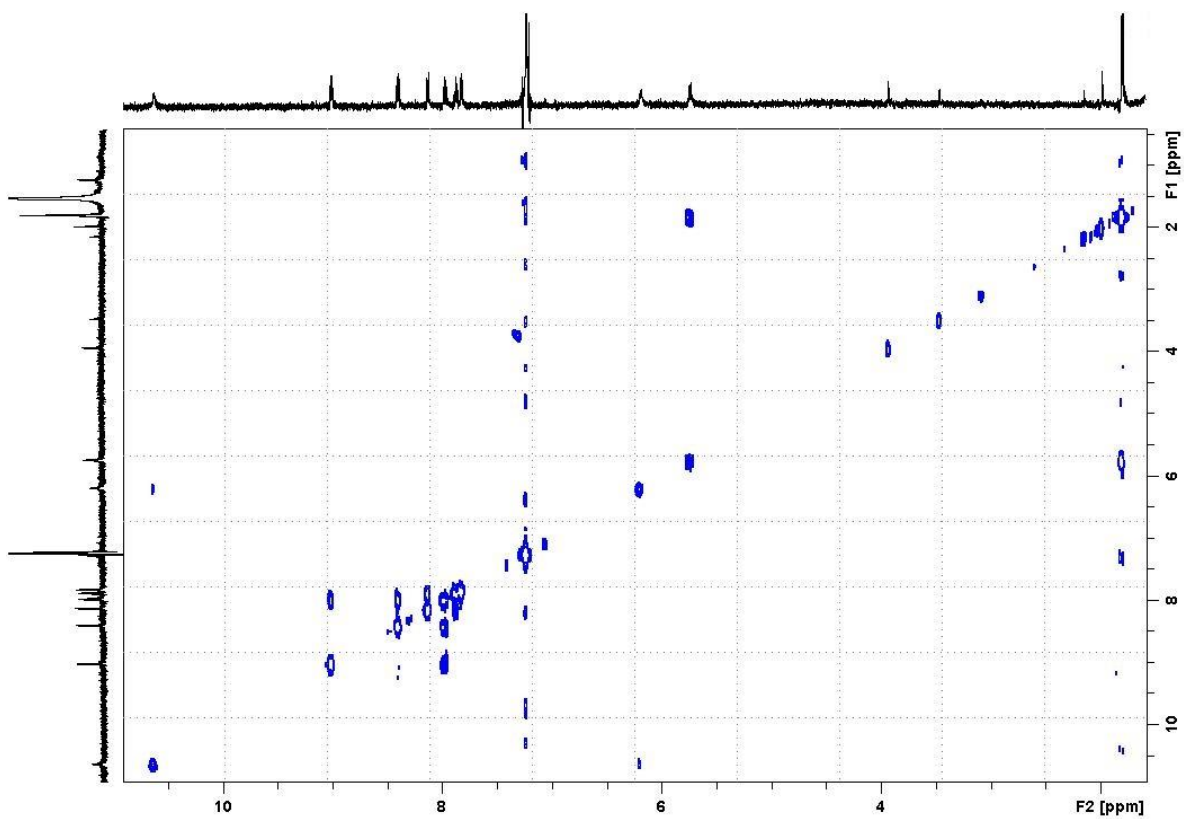

Figure S12. COSY spectrum of compound 2 in CDCl<sub>3</sub>.

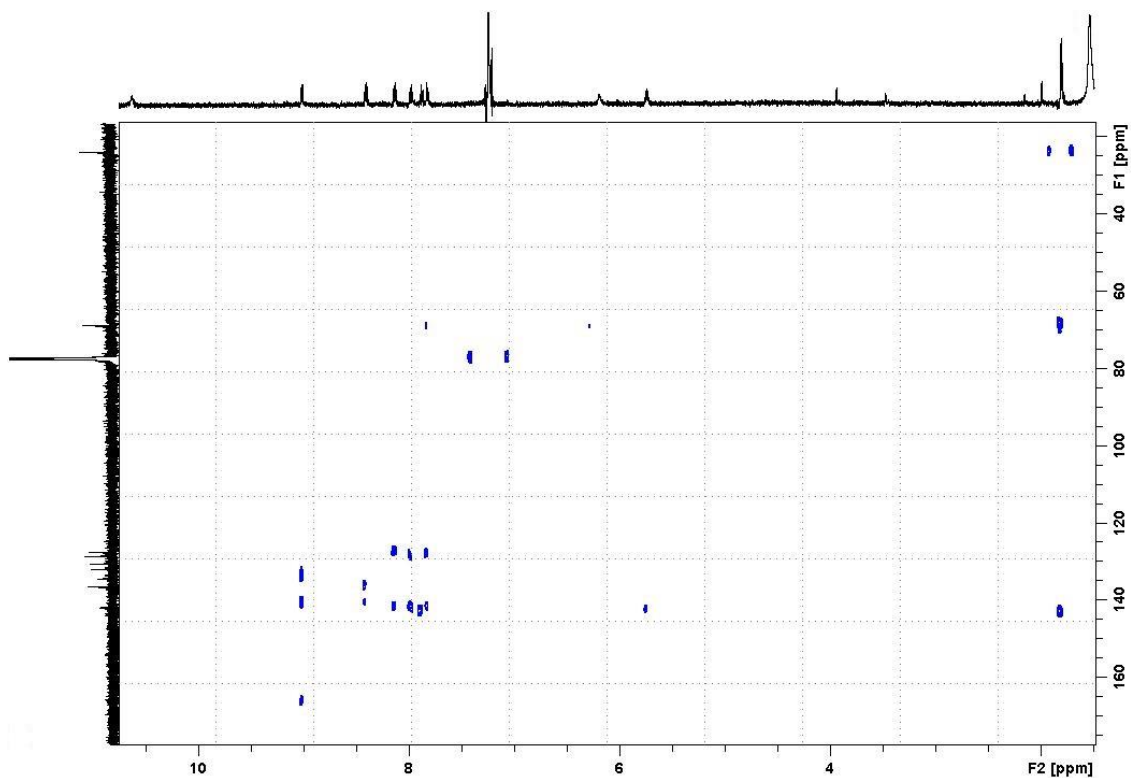

Figure S13. HMBC spectrum of compound 2 in CDCl<sub>3</sub>.

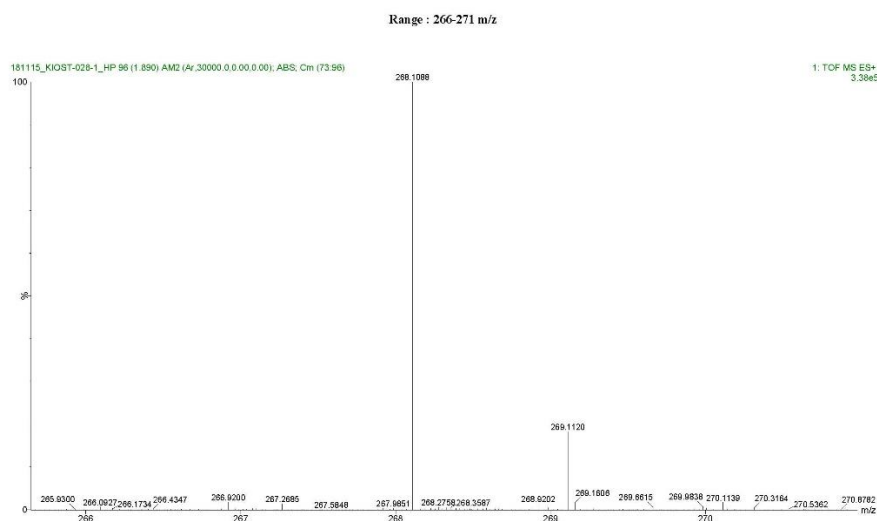

#### Elemental Composition Report

##### Single Mass Analysis

Tolerance = 50.0 PPM / DBE: min = -1.5, max = 50.0

Element prediction: Off

Number of isotope peaks used for i-FIT = 3

##### Monoisotopic Mass, Even Electron Ions

117 formula(e) evaluated with 2 results within limits (all results (up to 1000) for each mass)

Elements Used:

C: 15-40 H: 10-40 N: 1-10 O: 1-15

Minimum:

Maximum:

Mass

268.1088

| Calc. Mass | mDa  | PPM  | DBE  | i-FIT  | Norm  | Conf(%) | Formula                                                       |
|------------|------|------|------|--------|-------|---------|---------------------------------------------------------------|
| 268.1086   | 0.2  | 0.7  | 10.5 | 1146.3 | 0.013 | 98.73   | C <sub>15</sub> H <sub>14</sub> N <sub>3</sub> O <sub>2</sub> |
| 268.0974   | 11.4 | 42.5 | 10.5 | 1150.7 | 4.364 | 1.27    | C <sub>16</sub> H <sub>14</sub> N <sub>3</sub> O <sub>3</sub> |

Figure S14. HRESI-MS spectrum of compound 2.

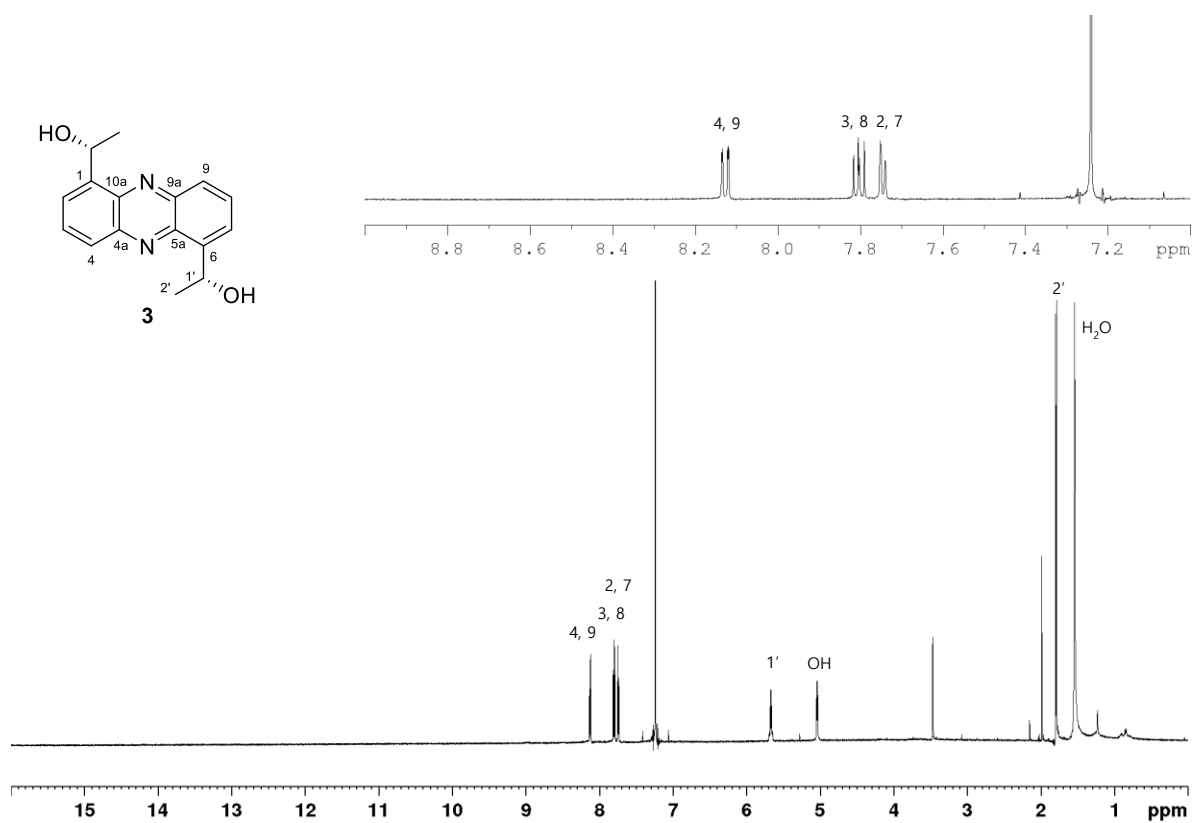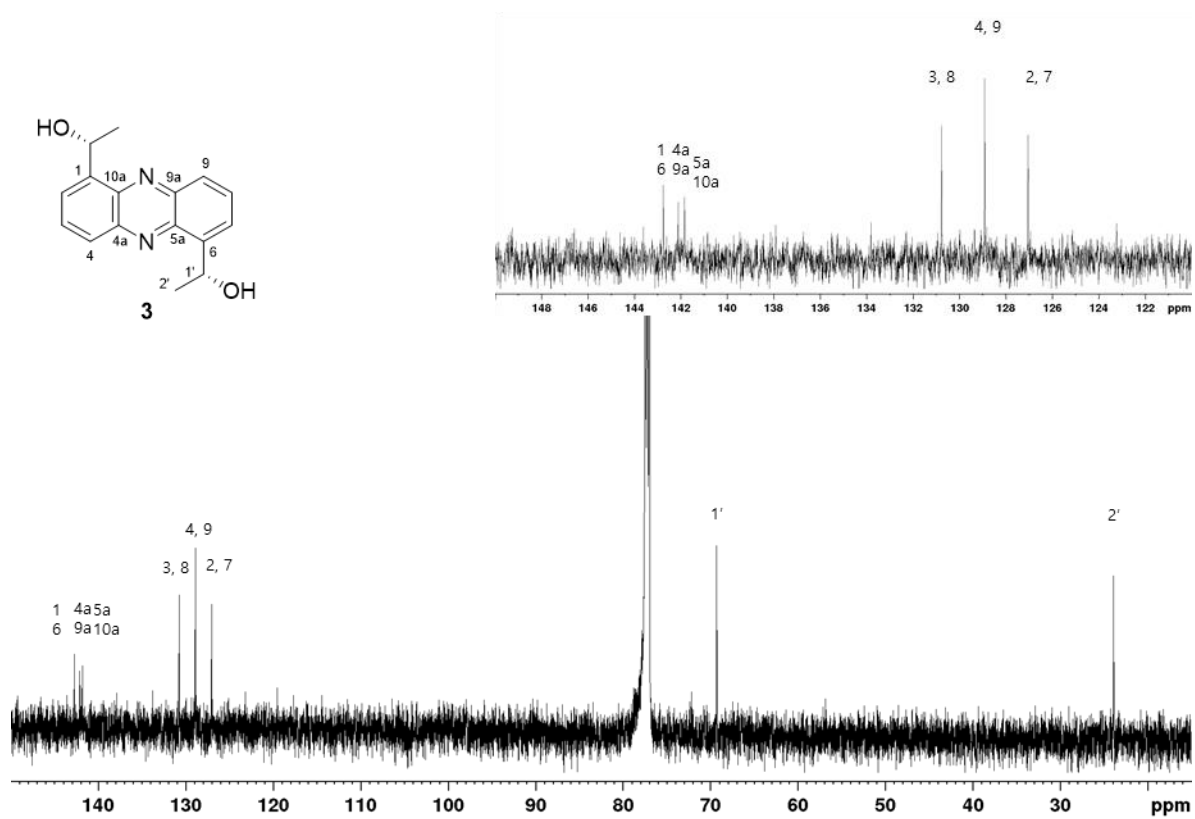

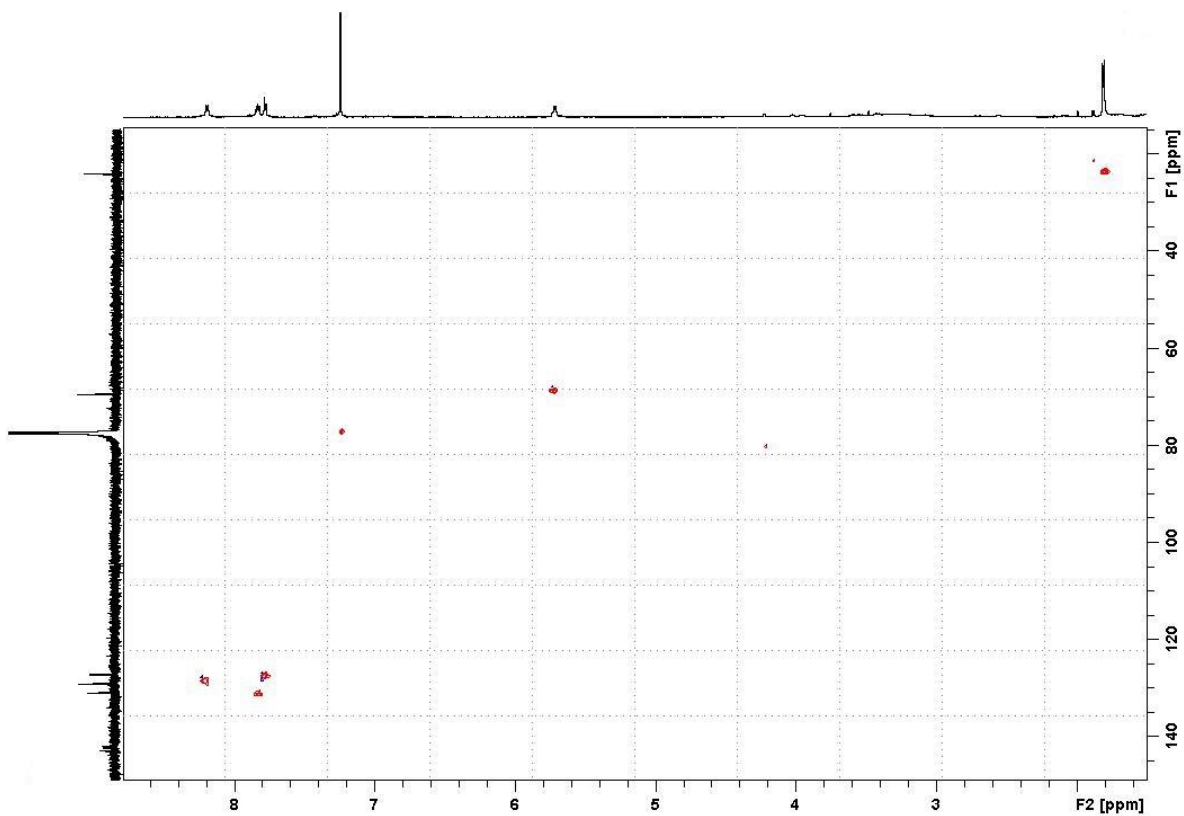

Figure S17. HSQC spectrum of compound 3 in CDCl<sub>3</sub>.

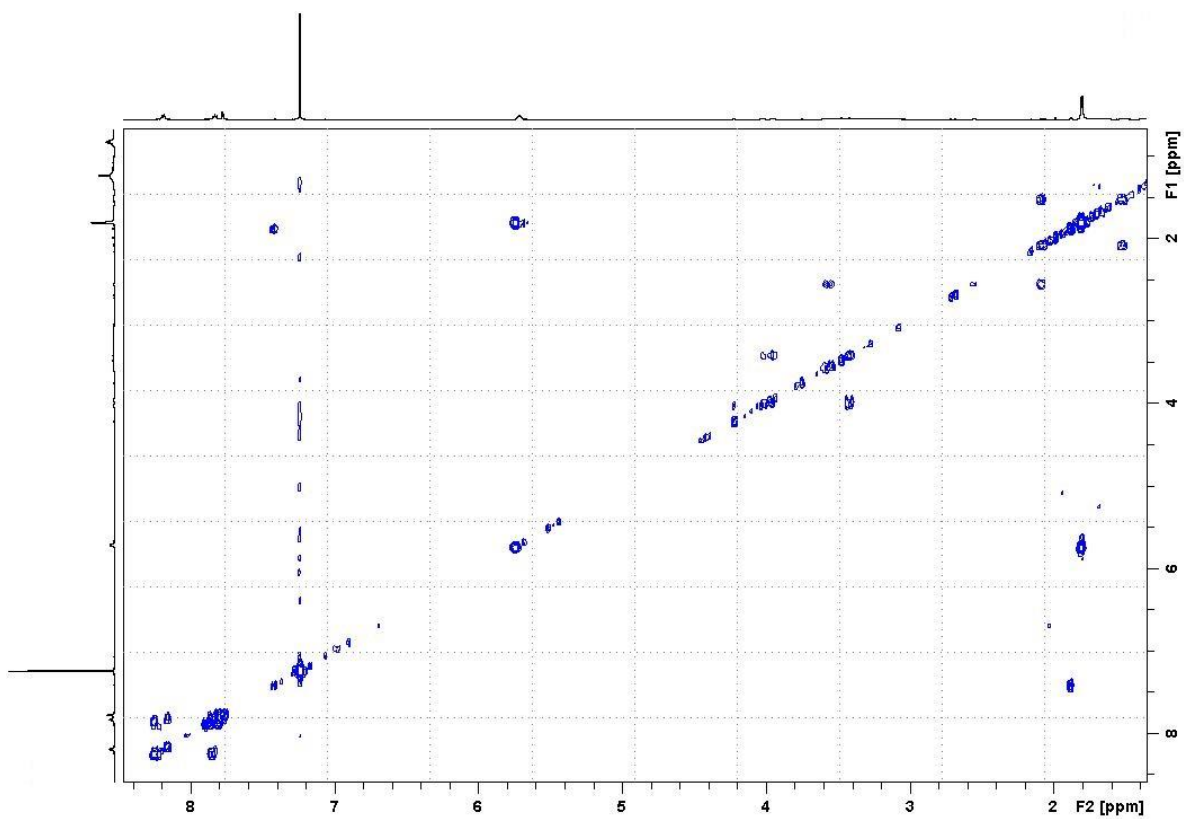

Figure S18. COSY spectrum of compound 3 in CDCl<sub>3</sub>.

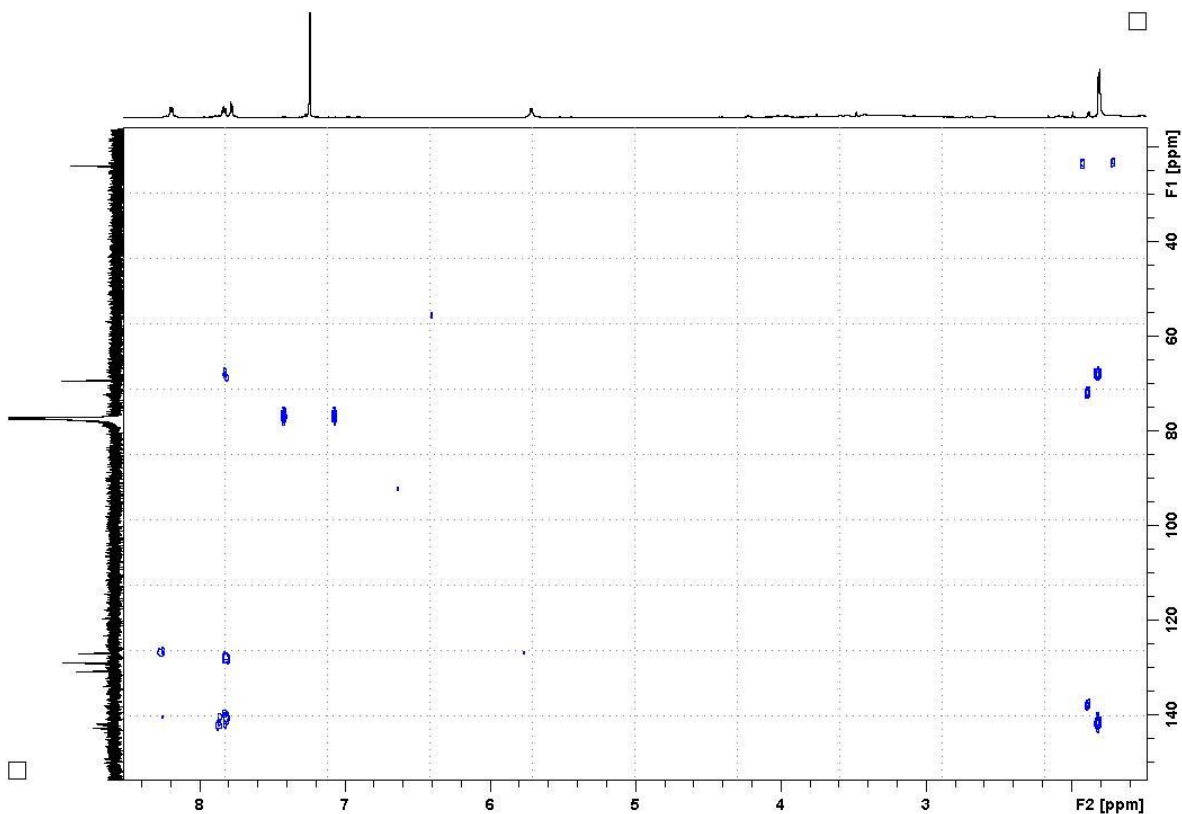

Figure S19. HMBC spectrum of compound 3 in CDCl<sub>3</sub>.

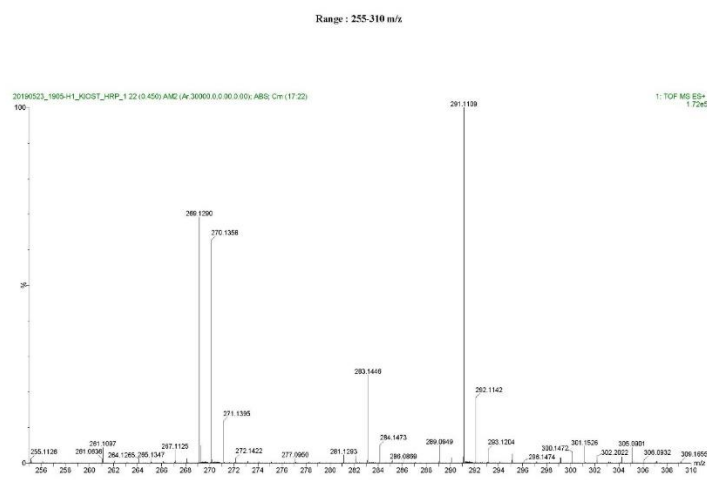

#### Elemental Composition Report

##### Single Mass Analysis

Tolerance = 5.0 PPM / DBE: min = -1.5, max = 100.0

Element prediction: Off

Number of isotope peaks used for i-FIT = 3

##### Monoisotopic Mass, Even Electron Ions

89 formula(e) evaluated with 1 results within limits (all results (up to 1000) for each mass)

Elements Used:

C: 0-25 H: 0-20 N: 1-3 O: 1-4 Mn: 0-1

Minimum:

-1.5

Maximum: 500.0 5.0 100.0

| Mass     | Calc. Mass | mDa | PPM | DBE | i-FIT  | Norm | Conf(%) | Formula          |
|----------|------------|-----|-----|-----|--------|------|---------|------------------|
| 269.1290 | 269.1290   | 0.0 | 0.0 | 9.5 | 1081.1 | n/a  | n/a     | C16 H17 N2 O2    |
| 291.1109 | 291.1109   | 0.0 | 0.0 | 9.5 | 894.3  | n/a  | n/a     | C16 H16 N2 O2 Na |

Figure S20. HRESI-MS spectrum of compound 3.

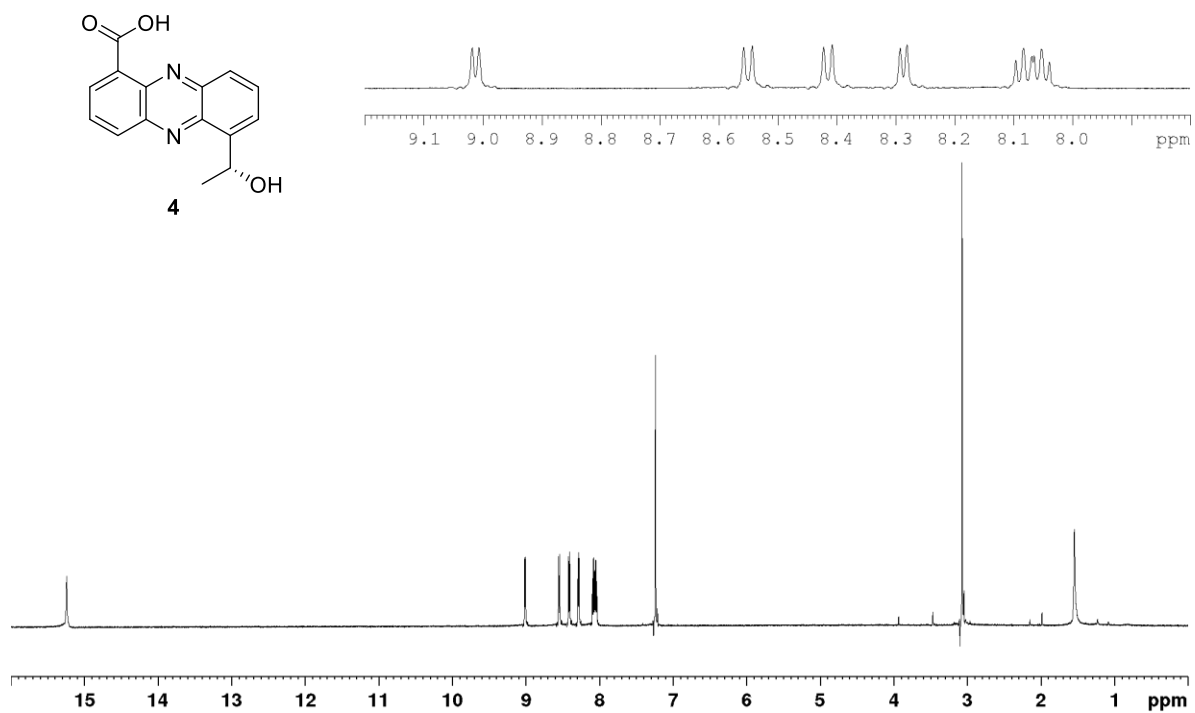

Figure S21. <sup>1</sup>H NMR spectrum of compound 4 (600 MHz, CDCl<sub>3</sub>).

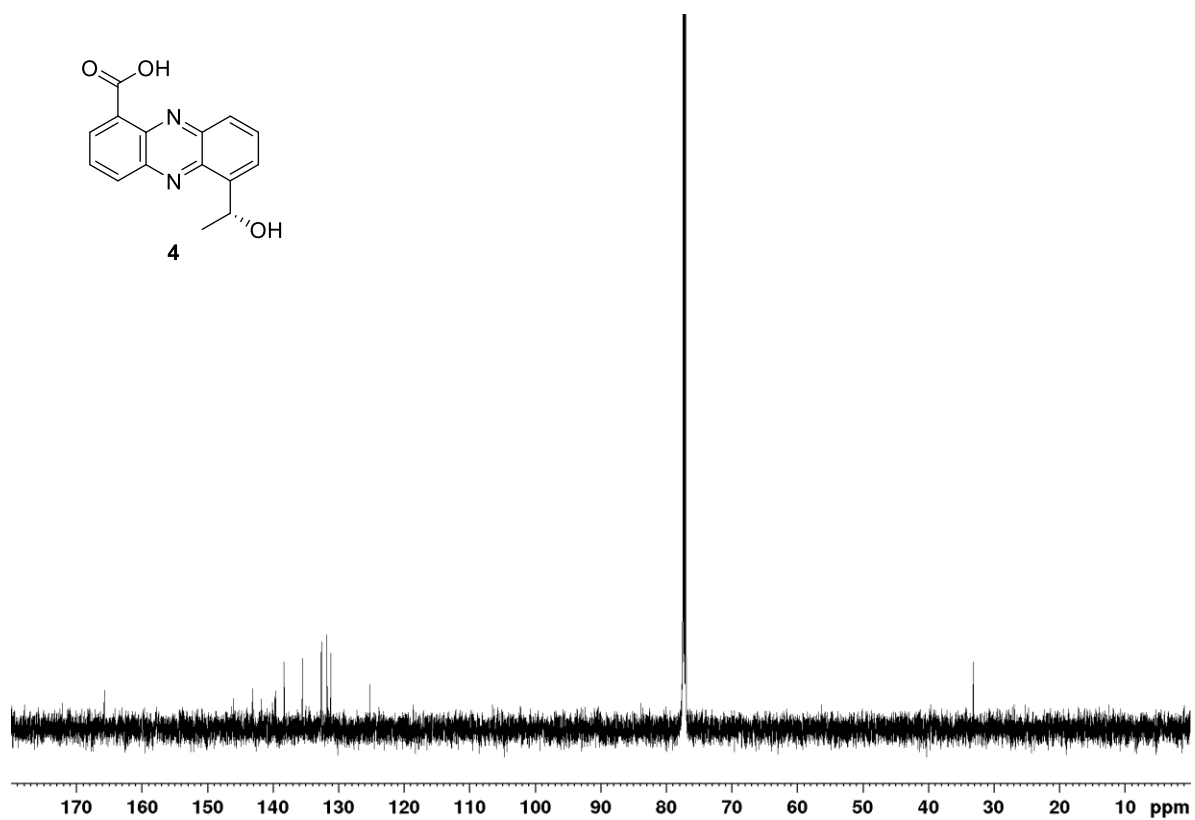

Figure S22. <sup>13</sup>C NMR spectrum of compound 4 (150 MHz, CDCl<sub>3</sub>).

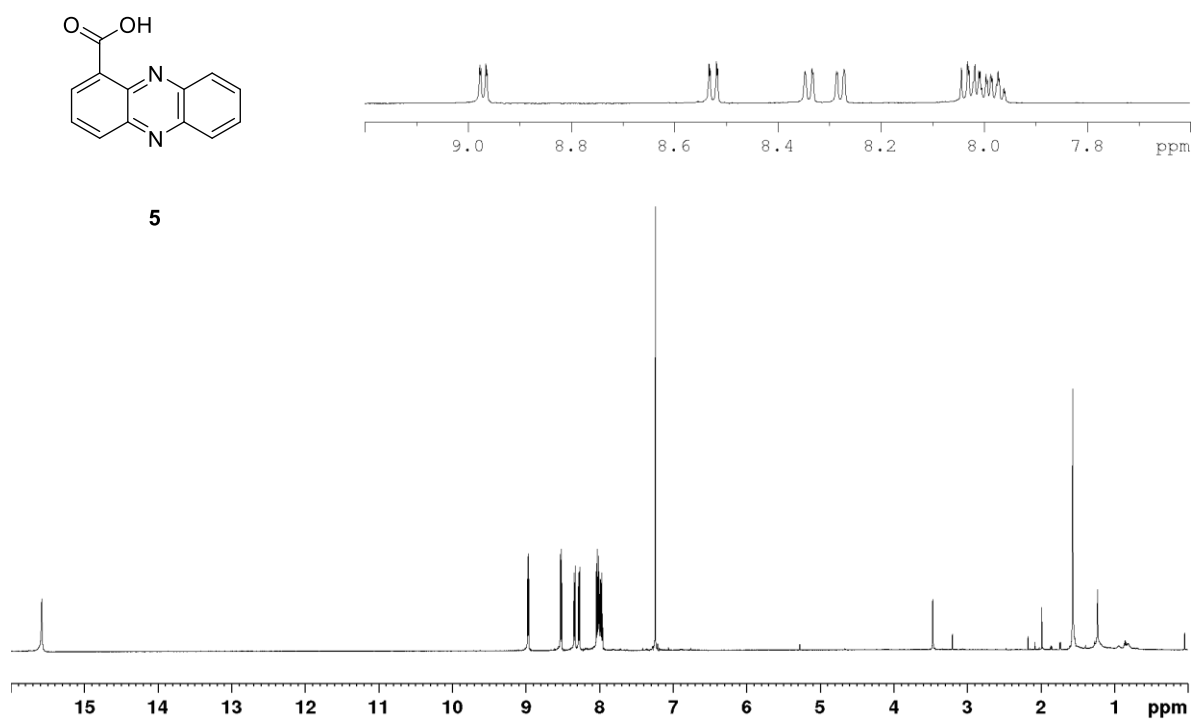

**Figure S23.**  $^1\text{H}$  NMR spectrum of compound **5** (600 MHz,  $\text{CDCl}_3$ ).

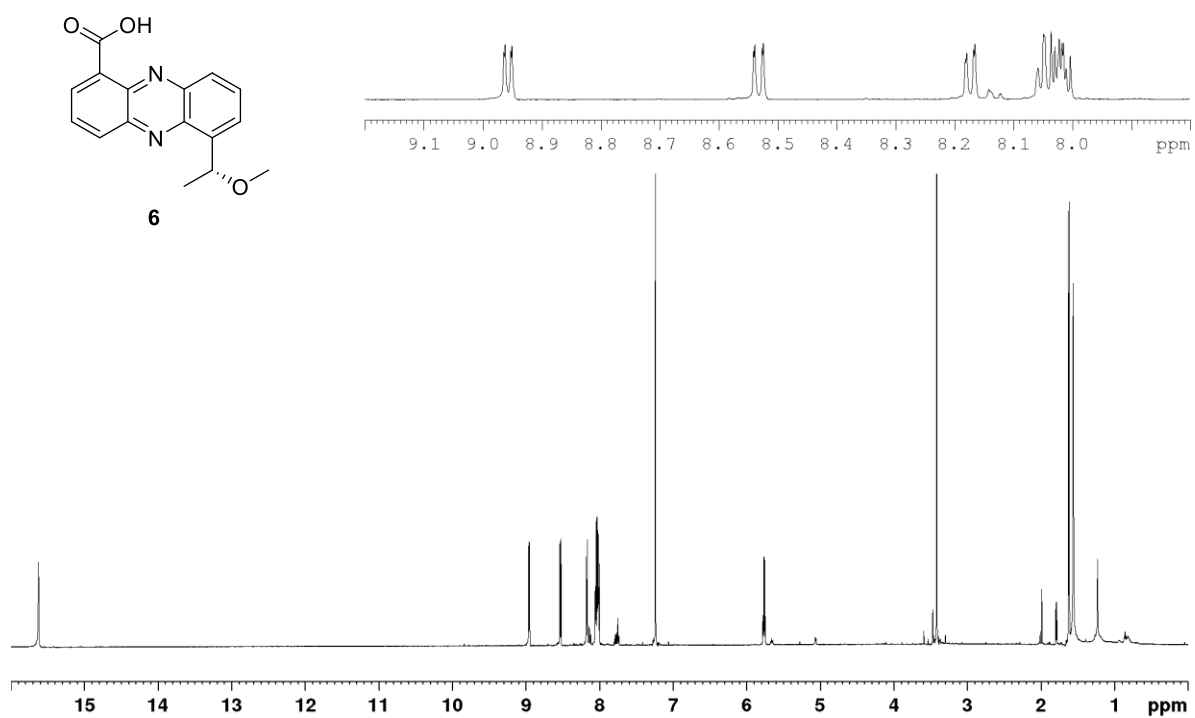

**Figure S24.**  $^1\text{H}$  NMR spectrum of compound **6** (600 MHz,  $\text{CDCl}_3$ ).

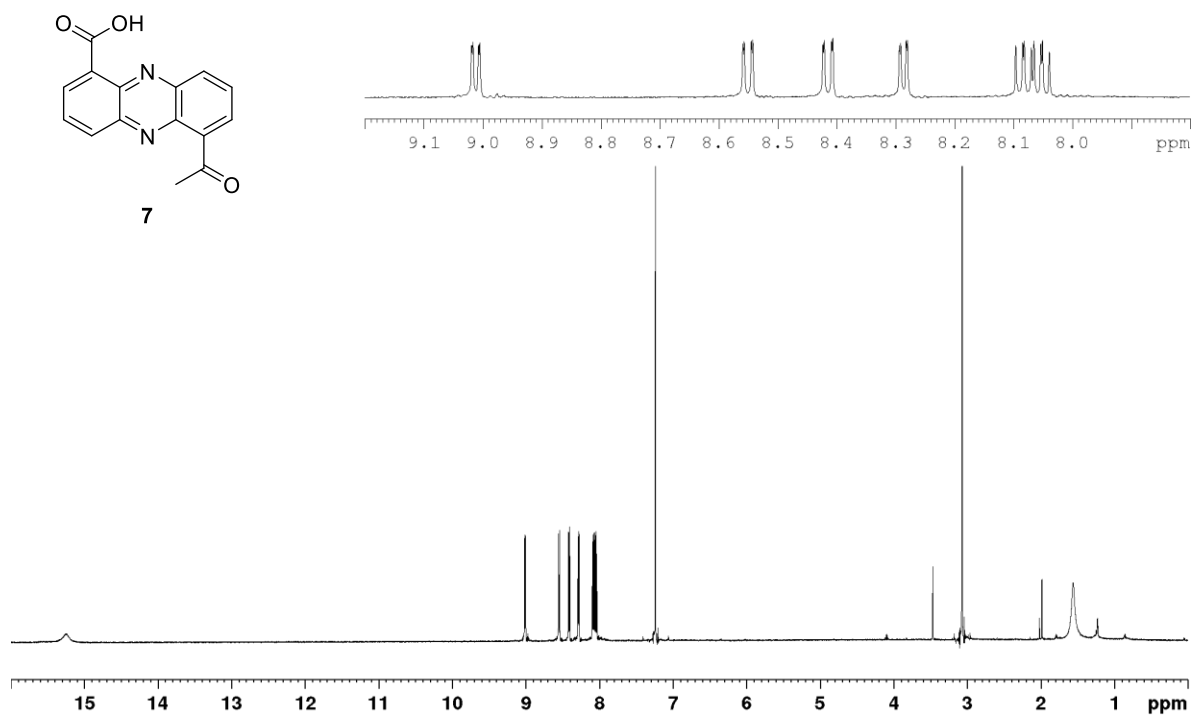

Figure S25. <sup>1</sup>H NMR spectrum of compound 7 (600 MHz, CDCl<sub>3</sub>).

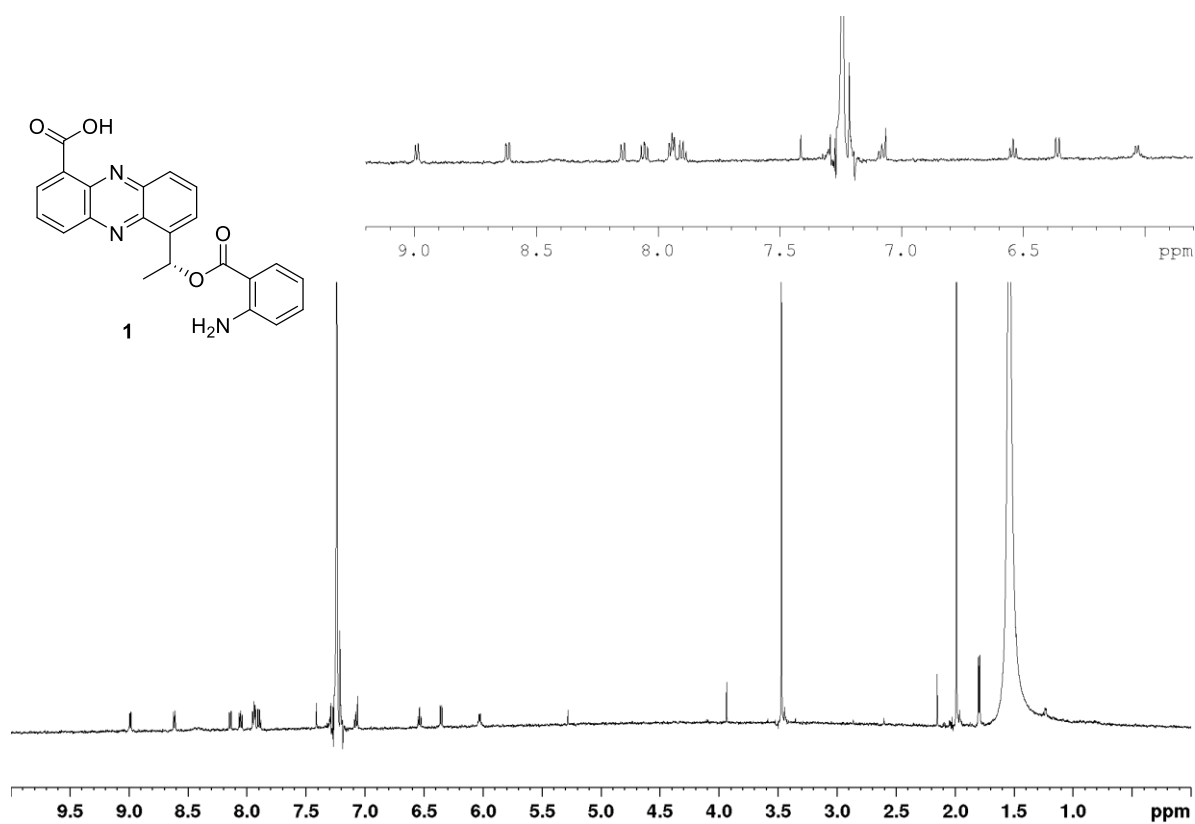

Figure S26. <sup>1</sup>H NMR spectrum of semi-synthesized 1 (600 MHz, CDCl<sub>3</sub>).



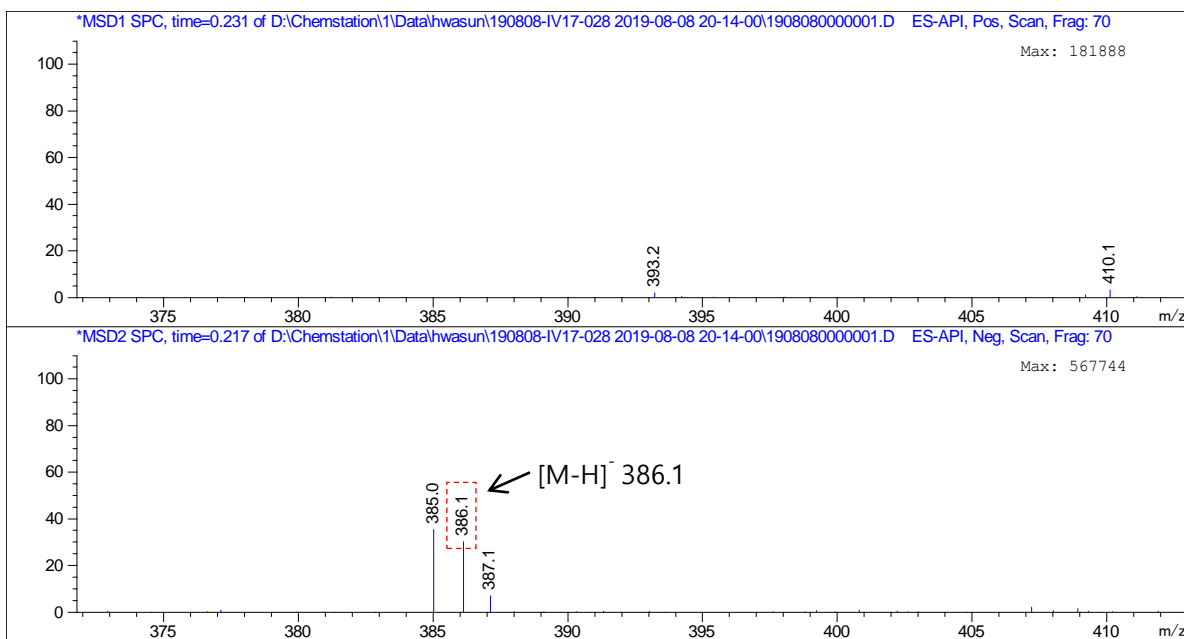

Figure S27. LR-MS spectrum of semi-synthesized **1**.

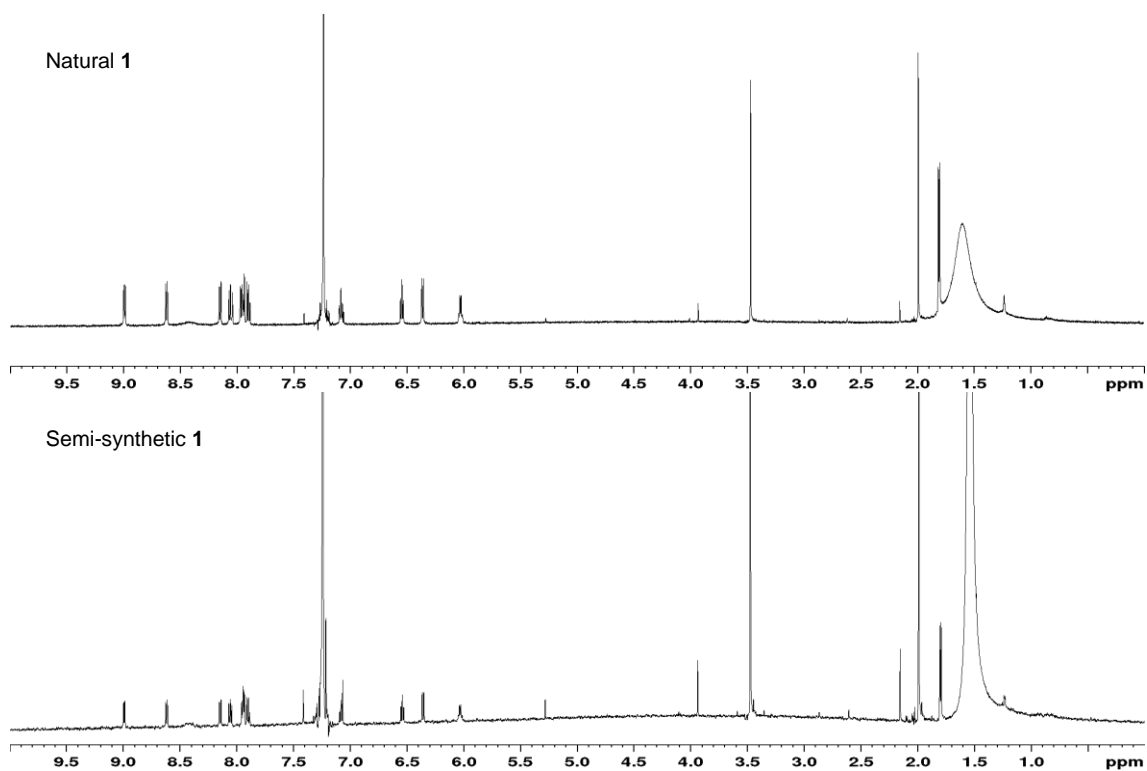

Figure S28. Comparison of  $^1\text{H}$  NMR data between semi-synthesized **1** and natural **1**.
